# Supplementary material for: Psychological Capital and Work–Family Conflict as Predictors of Work Engagement Among Senior Nurses: A Multicenter Cross-Sectional Study in Southwest China
Source: Research Square preprint supplement (doi:10.21203/rs.3.rs-8423153/v1), 2026-01-23
Supplement: Supplementary file 1 [file a528017ca9dc8cd0a9ebfd26.pdf]

### Statement on the Use of the Psychological Capital Scale

The Psychological Capital Scale was used in this study exclusively for non-commercial academic research purposes. The scale was administered to examine psychological capital among senior nurses in the context of work engagement research.

In this study, we adopted a validated Chinese version of the Psychological Capital Scale that has been widely used in nursing and healthcare research in China. The original structure, item wording, and scoring method of the scale were strictly followed, and no modifications were made to the scale content.

To our knowledge, the Psychological Capital Scale has been extensively applied in peer-reviewed nursing and medical journals for academic research without explicit requirements for obtaining formal written permission for non-commercial use. Recent examples include studies examining psychological capital among nurses in relation to presenteeism, burnout, job crafting, and team functioning, which have been successfully published in core Chinese nursing and medical journals (Jia et al., 2025; Qin et al., 2025; Wu et al., 2025; Ma et al., 2024).

All relevant sources were appropriately cited in the manuscript. At present, no formal licensing documentation is available for attachment. However, should the journal require documented authorization for the use of this scale, the authors are fully willing to contact the original developers or copyright holders to obtain formal permission.

This statement is provided to ensure transparency regarding the use of the Psychological Capital Scale and to comply with the ethical and editorial standards of BMC Nursing.

### References

- [1]Jia X, Chi W, Wang C, et al. The mediating effect of psychological capital between presenteeism and job burnout among pediatric nurses. Chinese Medical Herald. 2025;22(27):185–192. doi:10.20047/j.issn1673-7210.2025.27.35
- [2]Qin M, Yang J, Weng Y, et al. Psychological capital and its influencing factors among intensive care unit nurses. Chinese Health Standard Management. 2025;16(17):78–82.
- [3]Wu Z, Ma J, Wang S. Status of job crafting among clinical nurses and its influencing factors. Journal of Nursing Science. 2025;32(5):71–75. doi:10.16460/j.issn1008-9969.2025.05.071
- [4]Ma J, Feng H, Wang S, et al. Types of psychological capital and their relationship with team job crafting among nurses. Chinese Journal of Nursing. 2024;39(17):75–80.
